# Supplementary material for: B cell lymphoma 6 promotes hepatocellular carcinoma progression by inhibiting tumor infiltrating CD4+T cell cytotoxicity through ESM1
Source: PubMed Central journal article supplement (PMC11220024; doi:10.1038/s41698-024-00625-7), 2024-07-01
Supplement: 41698_2024_625_MOESM1_ESM.pdf [file 41698_2024_625_MOESM1_ESM.pdf]

# Supplementary Figures

## Fig. S1

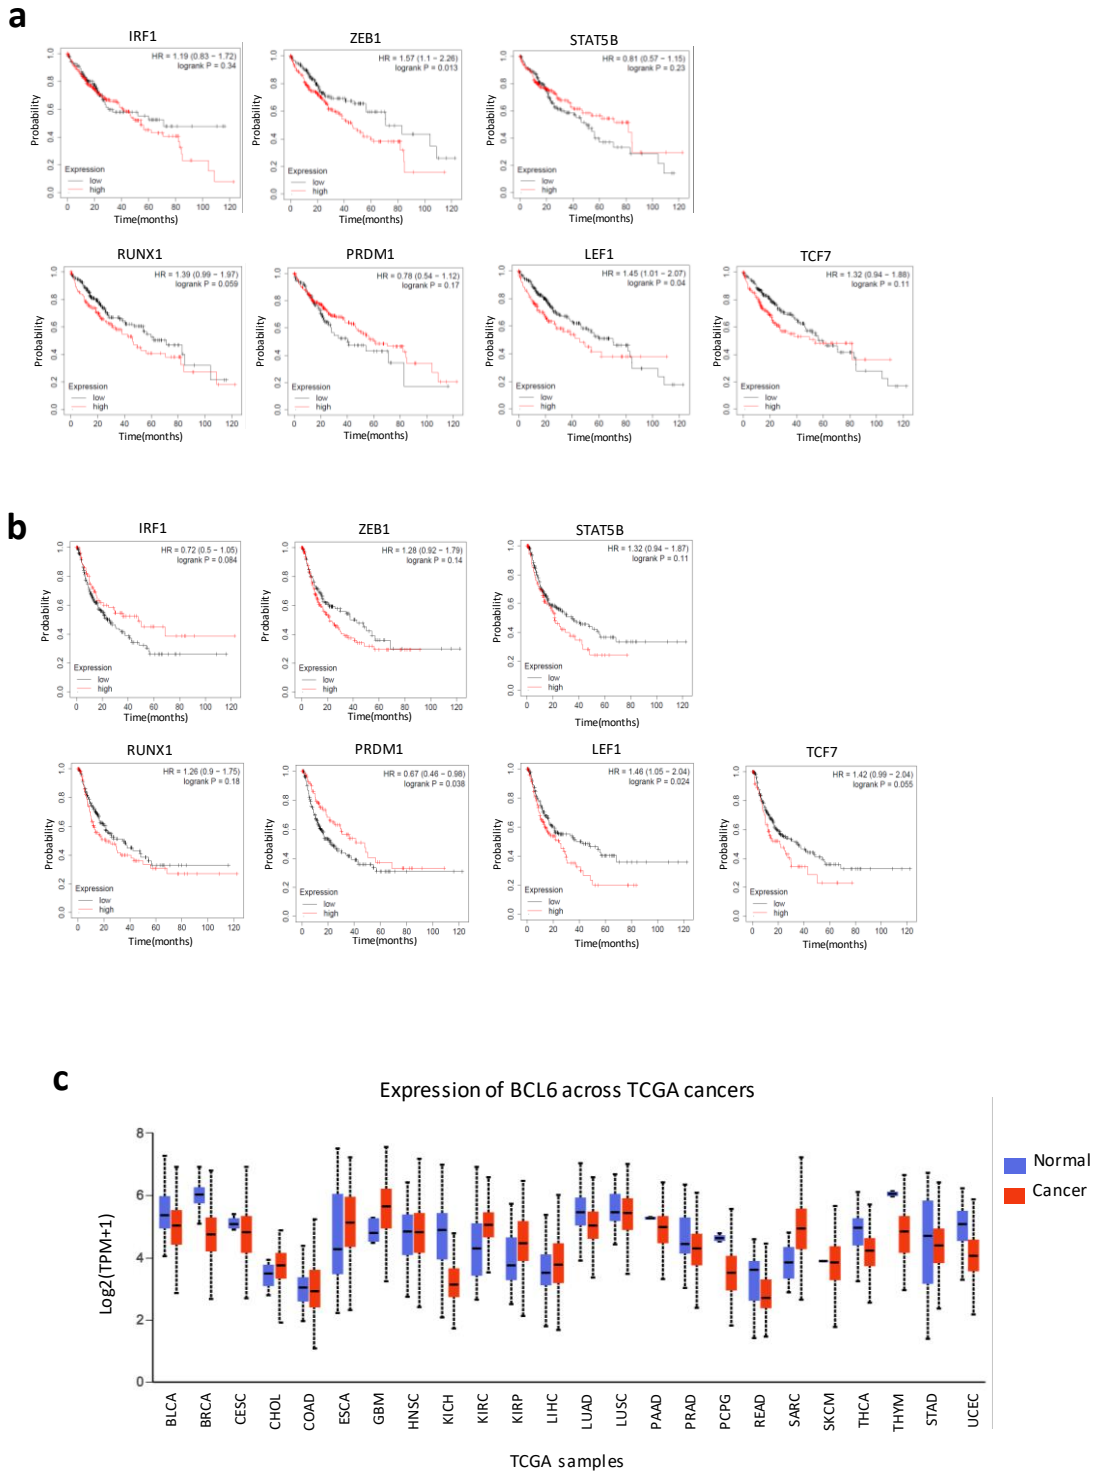

**Fig. S1. Overall survival (OS) and recurrence free survival (RFS) for the transcriptional factors.** (a) Overall survival for the TFs. (b) Recurrence free survival for the TFs. (c) Pan-cancer view of BCL6 expression using data from TCGA.

**Fig. S2**

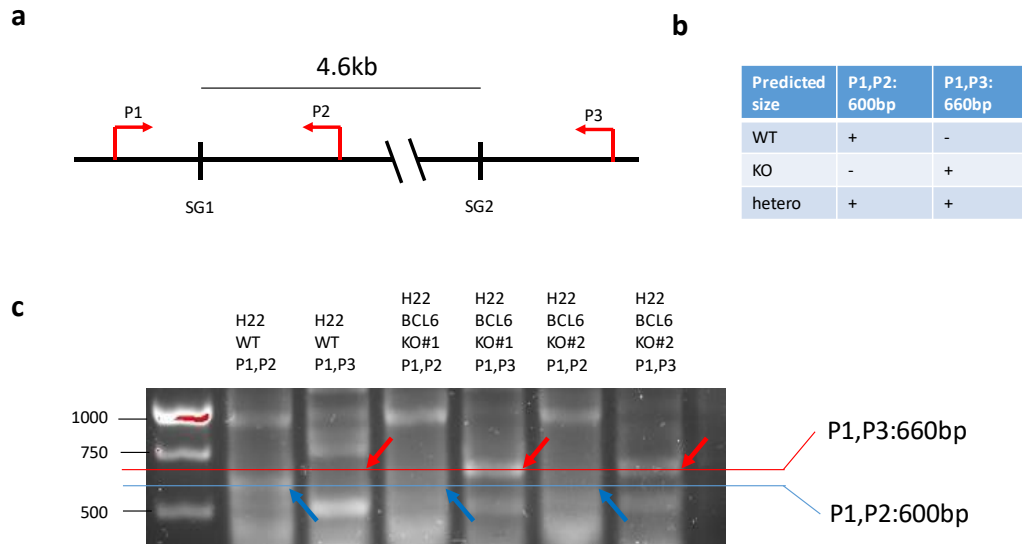

**Fig. S2. PCR for Bcl6 knockout confirmation.** (a) Scheme for Bcl6 knockout primer design and the predicted size for the PCR product (b). (c) PCR confirmation of Bcl6 knockout using H22 cell genome DNA.

**Fig. S3**

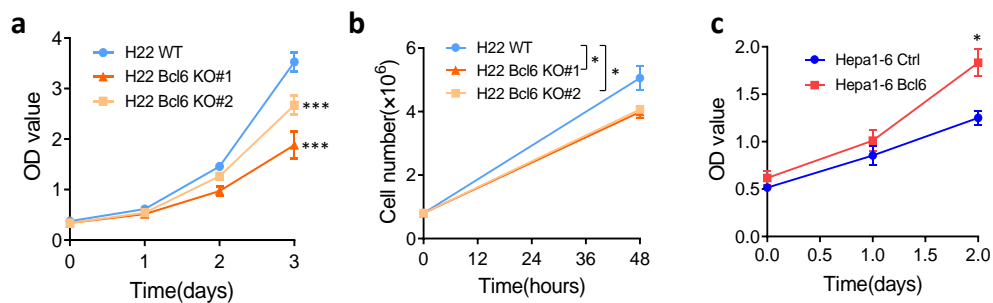

**Fig. S3. Bcl6 promotes HCC cancer cell growth in vitro.** CCK8 assay (a) and cell growth curve (b) for H22 wild type and Bcl6 knockout group, n=3 each group. (c) CCK8 assay for Hepa1-6 ctrl and Bcl6 overexpression cell lines, n=3 each group. \* $p < 0.05$ , \*\*\* $p < 0.001$ .

**Fig. S4**

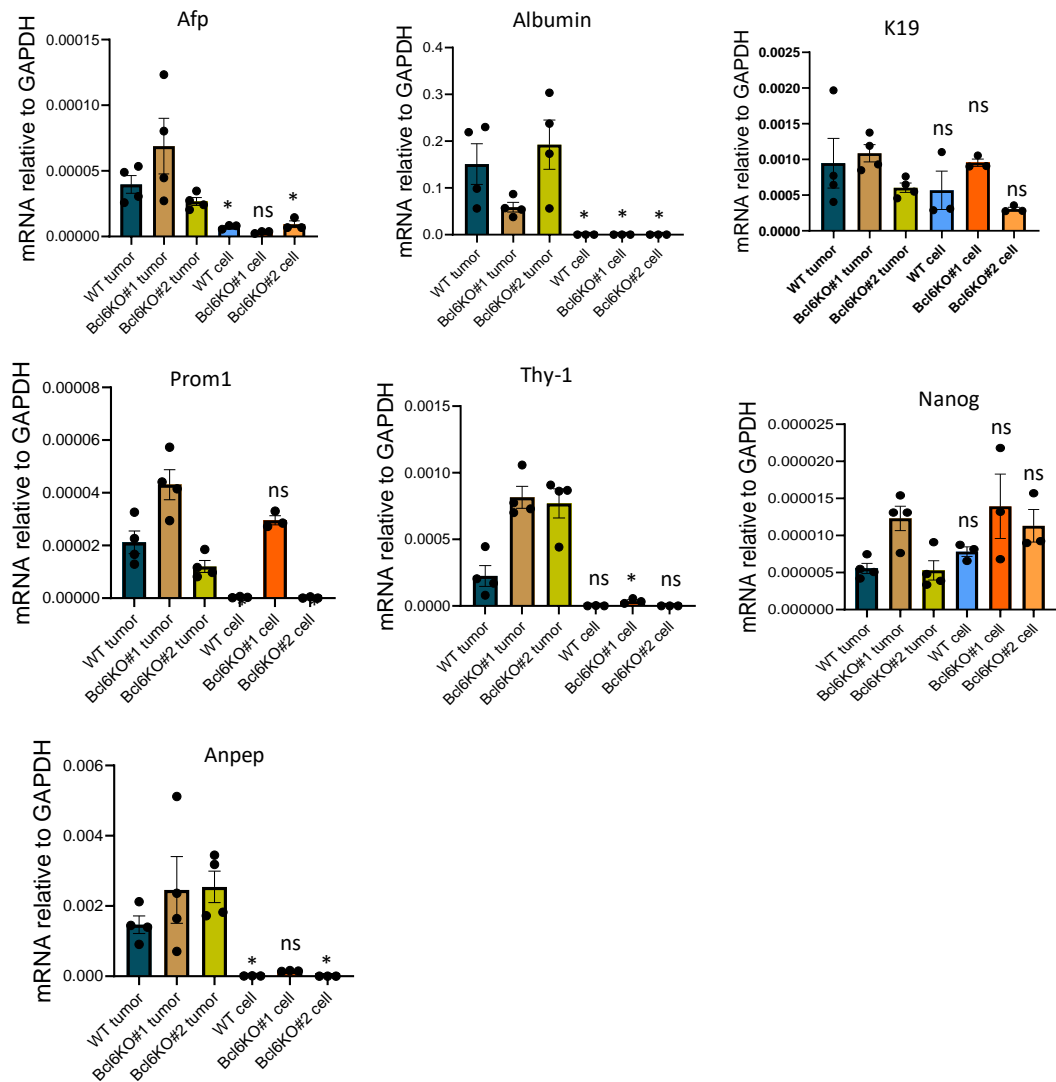

**Fig. S4. H22 tumor expression higher differentiation and stem cell genes than H22 cell line.** qPCR data for differentiation marker genes Atp, Albumin, K19 and cancer stem cell marker genes Prom-1, Thy-1, Nanog, Anpep in H22 tumor and H22 cell lines with and without knockout of Bcl6. n=4 per group, \* $p < 0.05$ , \*\* $p < 0.01$ , \*\*\* $p < 0.001$ , ns: no significance.

**Fig. S5**

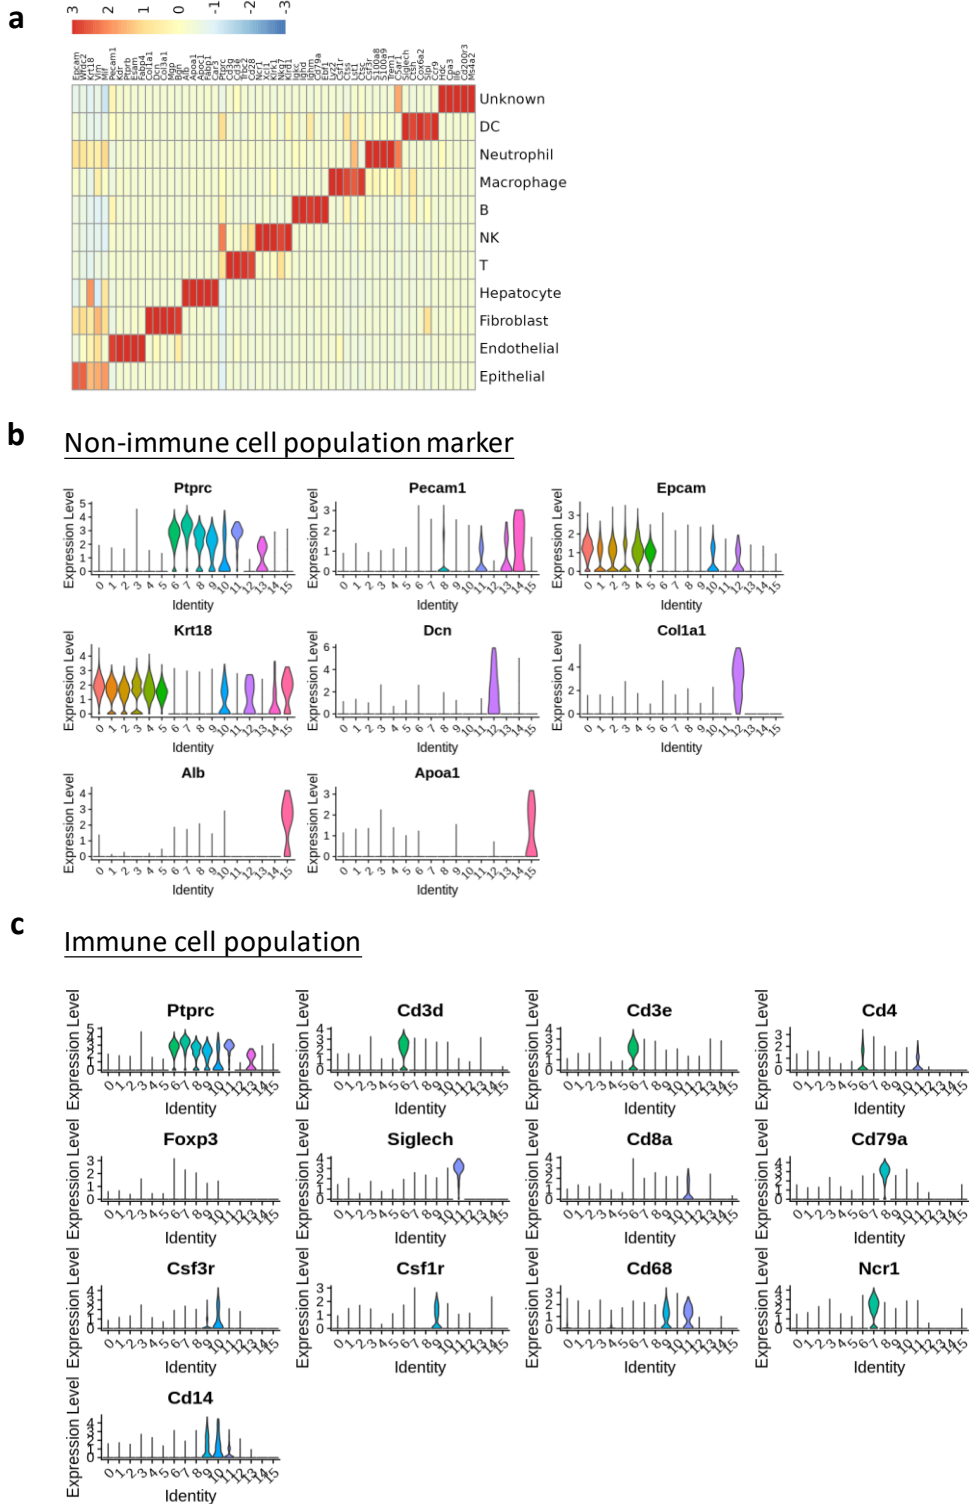

**Fig. S5. Markers used for single cell RNA sequencing cell cluster definition.**(a) Heatmap showing immune cell as well as non-immune cell gene expression patterns.(b) Expression of representative marker genes used for cell cluster definition in each cell cluster for non-immune cells (b) and immune cells (c), cell cluster definition: 0:

Epithelial\_c1, 1: Epithelial\_c2, 2: Epithelial\_c3, 3: Epithelial\_c4, 4: Epithelial\_c5, 5: Epithelial\_c6, 6: CD4+T, 7: NK, 8: B, 9: Macrophage, 10: Neutrophil, 11: DC, 12: Fibroblast, 13: Unknown, 14: Endothelial, 15: Hepatocyte.

**Fig. S6**

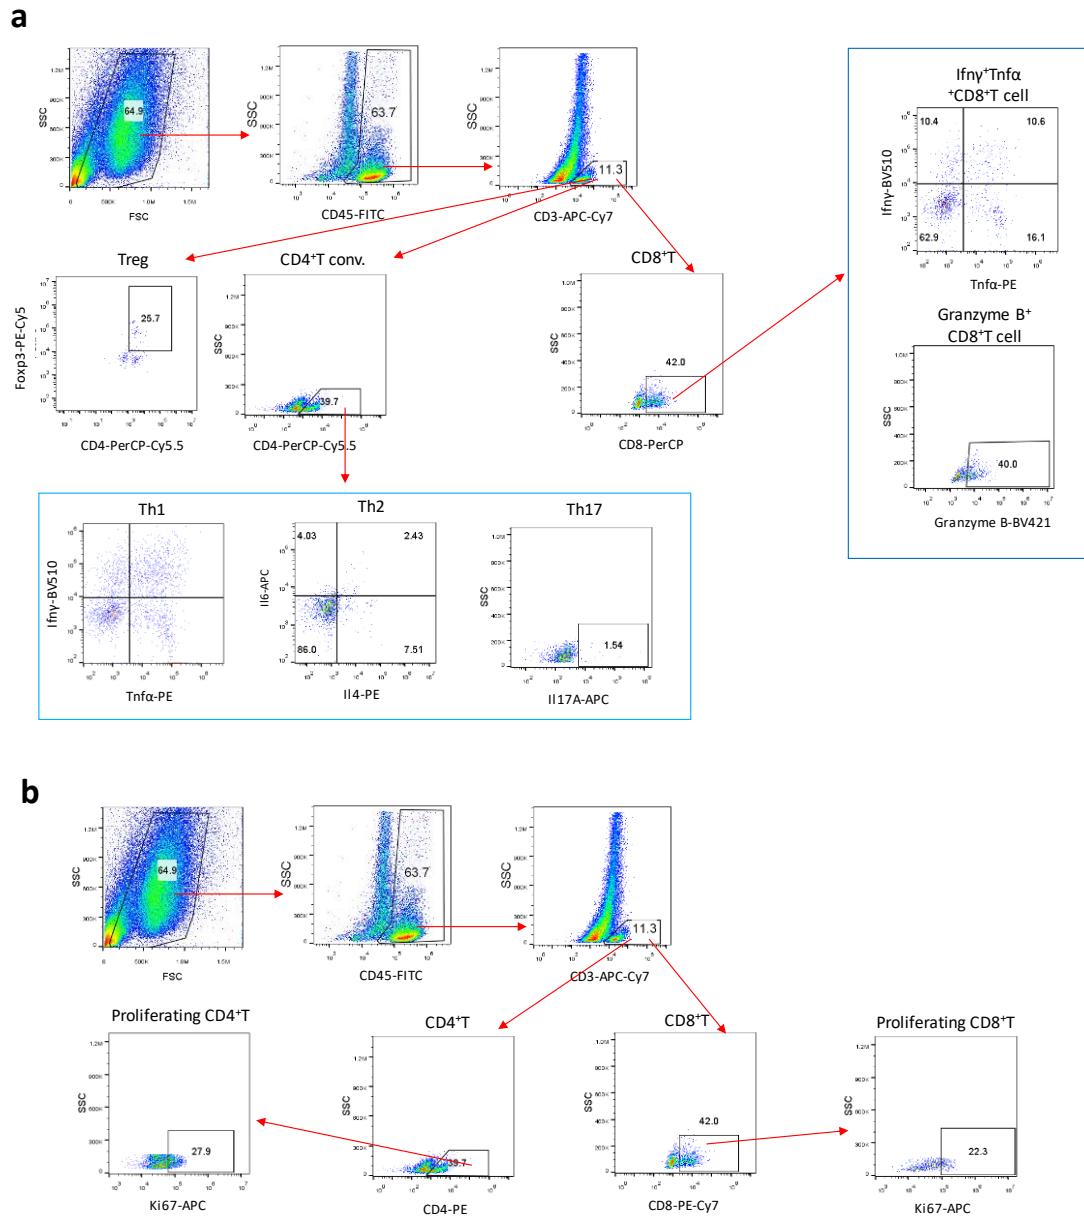

**Fig. S6. Gating strategy for CD4<sup>+</sup>T cells and CD8<sup>+</sup>T cells.** (a) Gating strategy for CD45<sup>+</sup>immune cells, CD3<sup>+</sup>T cells, Th, Treg and CD8<sup>+</sup>T cells infiltration and differentiation presented on Fig. 4a, 4b, 4d, 4e, 4f, 4h-4l. (b) Gating strategy for proliferating T cells presented on Fig. 4g.

**Fig. S7**

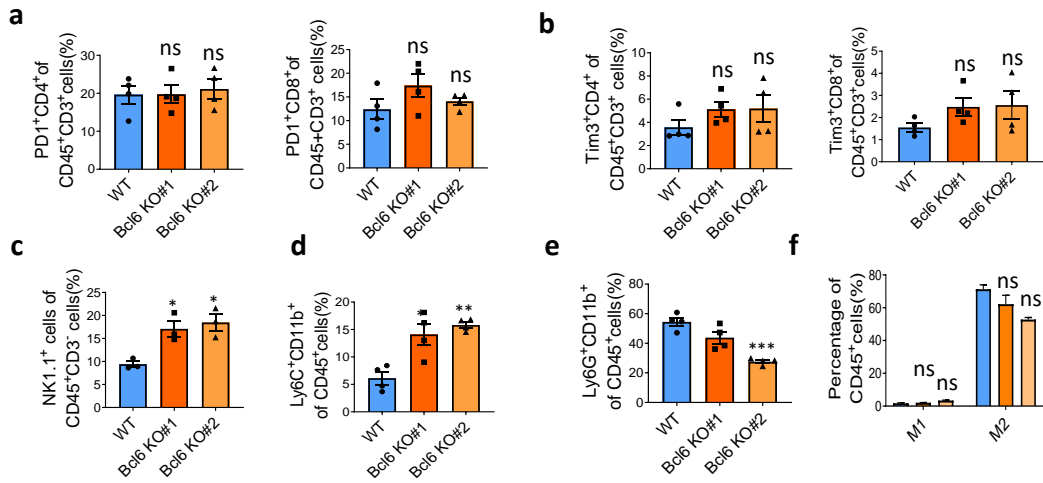

**Fig. S7. Effect of Bcl6 knockout on T cell exhaustion and innate immune cell infiltration.** (a) Flow cytometry data indicated that Bcl6 knockout does not affect the percentage of PD1<sup>+</sup>CD4<sup>+</sup> T cells or PD1<sup>+</sup>CD8<sup>+</sup>T cells in each group. (b) Tim3<sup>+</sup>T cells infiltration in tumor was also not affected by Bcl6 knockout in each group. Flow cytometry data showed that knockout of Bcl6 increased NK cells (c) and Ly6C high MDSC infiltration (d), but decreased Ly6G high MDSC infiltration (e), no effect on M1 or M2 polarization (f), n=3-4 per group. \* $p < 0.05$ , \*\* $p < 0.01$ , \*\*\* $p < 0.001$ .

**Fig. S8**

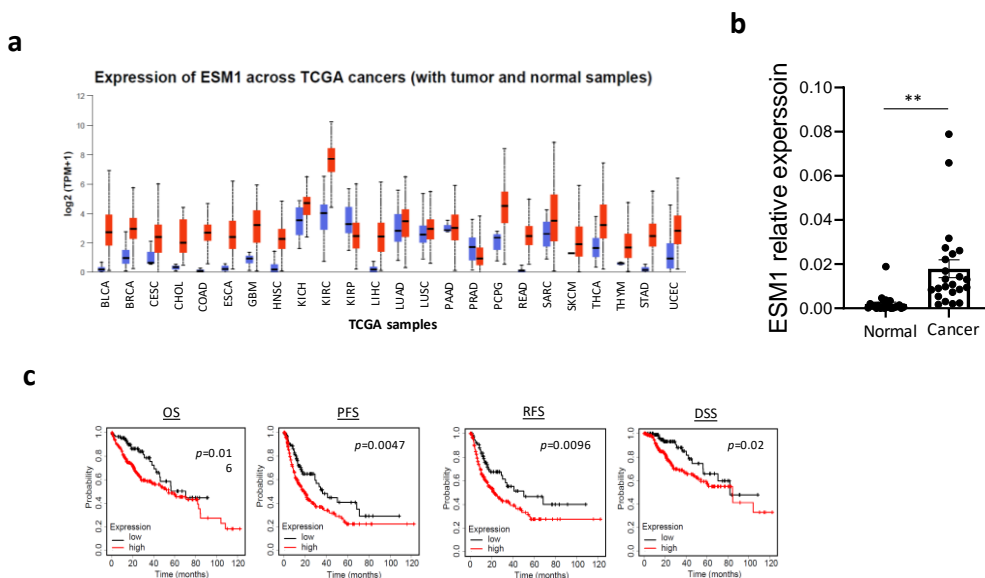

**Fig. S8. ESM1 expression in pan cancer data as well as function on liver cancer cell.** (a) Pan-cancer view of ESM1 expression. (b) ESM1 expression using qPCR analysis. (c) ESM1 on liver cancer survival based on TCGA data. OS: overall survival, PFS: progression-free survival, RFS: recurrence-free survival, DSS: disease free survival (DSS). \*\* $p < 0.01$ .

**Fig. S9**

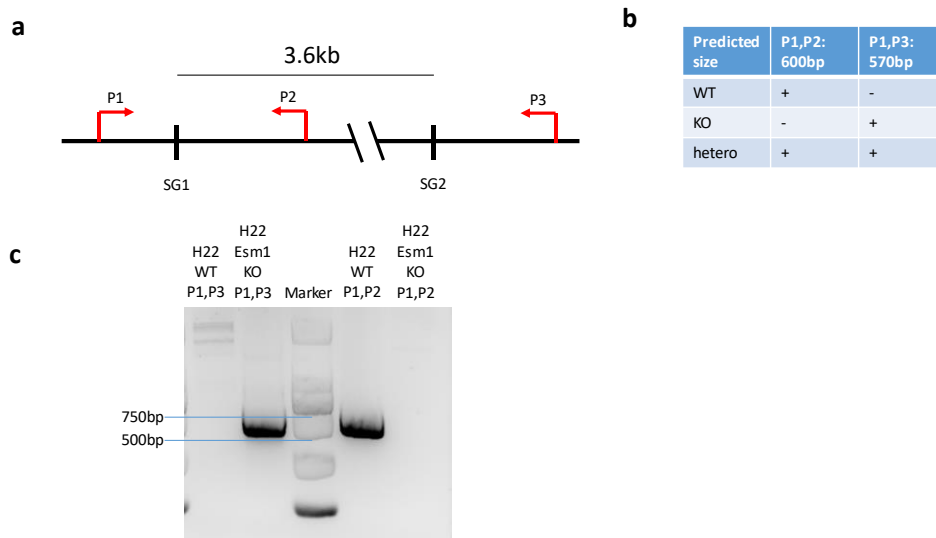

**Fig. S9. PCR for Esm1 knockout confirmation.** (a) Scheme for Esm1 knockout primer design and the predicted size for the PCR product (b). (c) PCR confirmation of Esm1 knockout using H22 cell genome DNA.

**Fig. S10**

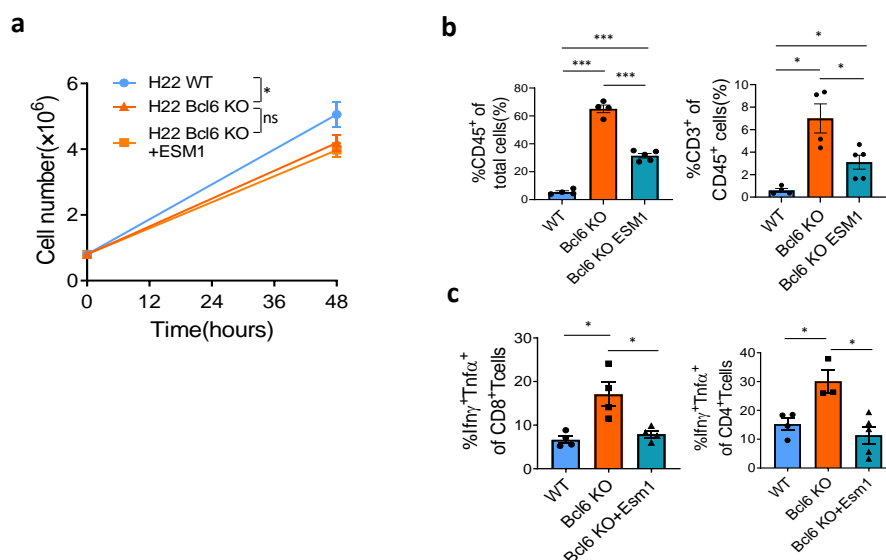

**Fig. S10. ESM1 expression in pan cancer data as well as function on liver cancer cell.** (a) H22 wild type, Bcl6 knockout and Bcl6 knockout with Esm1 overexpression cells proliferation were monitored within 48 hours and showed that Esm1 does not affect cancer cell proliferation, n=3 each group. Flow cytometry quantification for tumor infiltration immune cells (b) and T cells activation (c) for H22 WT, Bcl6 KO and Bcl6 KO+Esm1 overexpression at 2 weeks post H22 injection, n=4-5 per group. \* $p < 0.05$ , \*\*\* $p < 0.001$ , ns: no significance.

**Fig. S11**

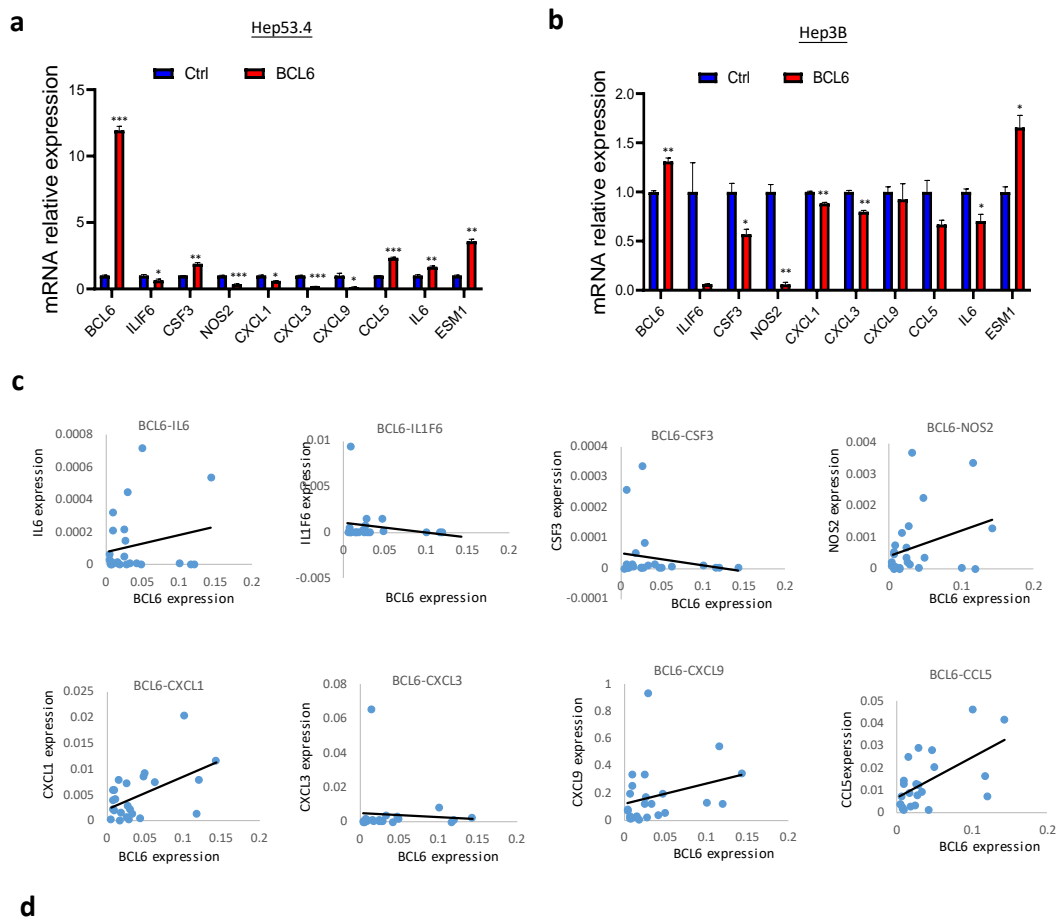



**Fig. S11. BCL6 and inflammatory genes in different cell lines and HCC patient samples.** qPCR for inflammatory genes and ESM1 in Hep53.4 (a) and Hep3B (b) with or without BCL6 overexpression. n=3 per group. (c) Correlation of BCL6 expression with inflammatory genes and ESM1 in HCC patients samples based on qPCR data. (d) Pearson correlation value for BCL6 and inflammatory genes and ESM1 in total HCC samples and sex separated groups. \* $p < 0.05$ , \*\* $p < 0.01$ , \*\*\* $p < 0.001$ , ns: no significance.

**Fig. S12**

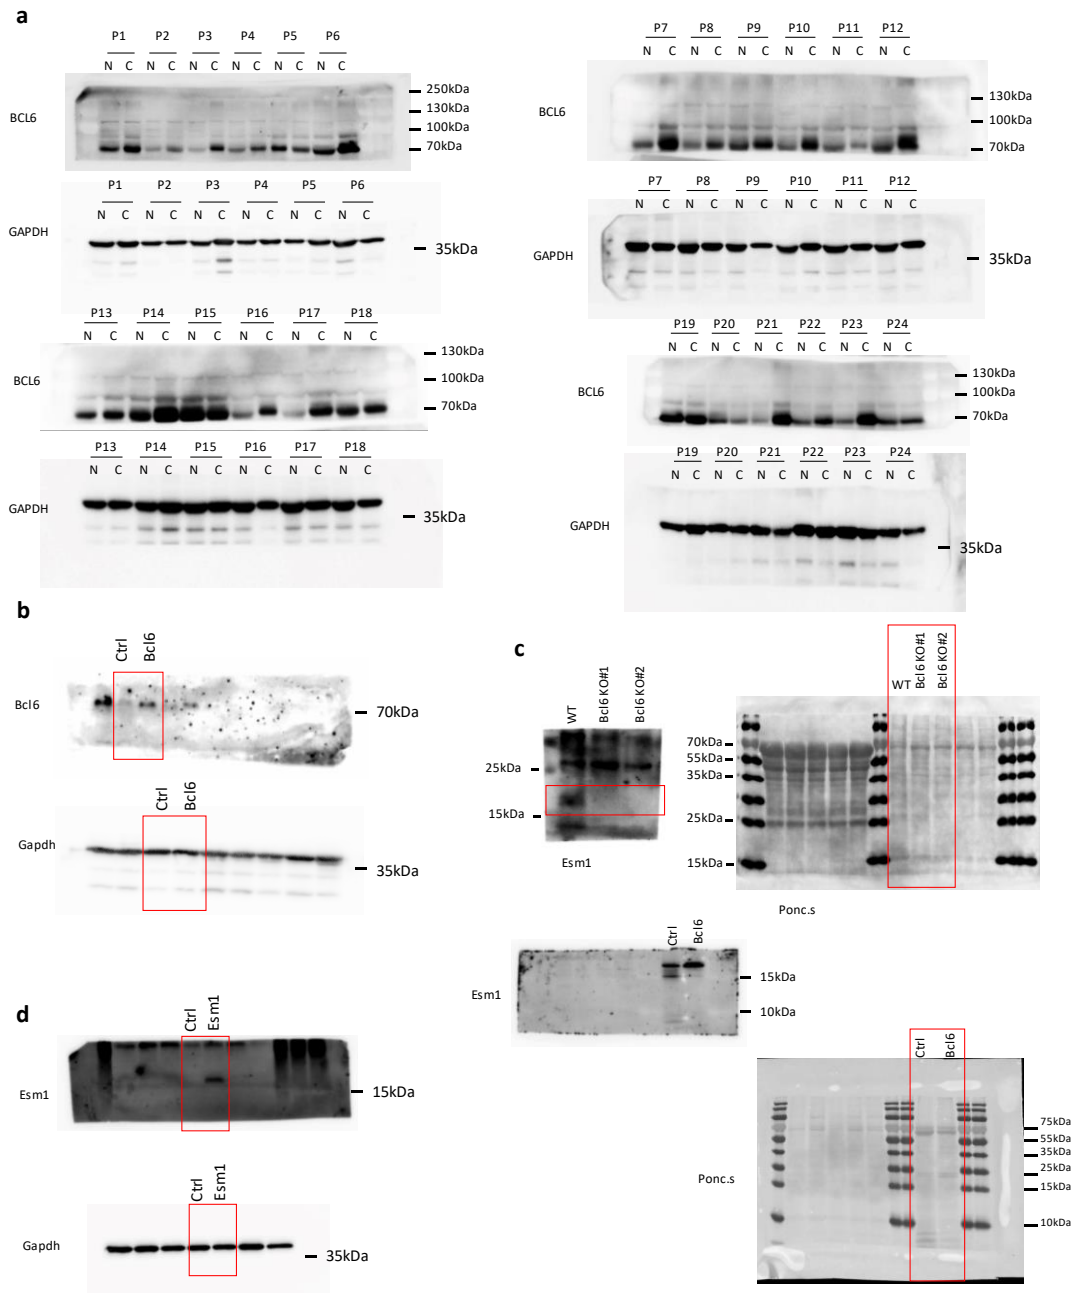

**Fig. S12. Western blotting raw data.** (a) Uncropped scans of the western blotting for detecting of BCL6 expression in human patient samples as shown in Fig. 1h. (b) Uncropped scans of the western blotting for Bcl6 overexpression in Hepa1-6 overexpression as shown in Fig. 2i. (c) Uncropped scans of the western blotting for Esm1 expression in the medium of H22 WT or Bcl6 knockout cell lines, and Hepa 1-6 ctrl and Bcl6 overexpression cell lines as shown in Fig. 6g. (d) Western blotting scans for Esm1 expression in H22 Bcl6 KO control line and Bcl6 KO+Esm1 overexpression line.

## Supplementary Tables

**Supplementary Table 1. Patient information for HCC paraffin samples**

| Tissue type(Cancer:C, adjacent normal tissue:N) | Surgery data(year-month) | Living state | Survival time(month) | Sex  | Age     | Stage(I-IV) |
|-------------------------------------------------|--------------------------|--------------|----------------------|------|---------|-------------|
| C and N                                         | 2007-1                   | Live         | 80                   | Male | unknown | III         |
| C and N                                         | 2007-2                   | Live         | 79                   | Male | 67      | II          |
| C and N                                         | 2007-3                   | Live         | 78                   | Male | 58      | II          |
| C and N                                         | 2007-4                   | Live         | 77                   | Male | 62      | I - II      |
| C and N                                         | 2007-8                   | Live         | 73                   | Male | 50      | II          |
| C and N                                         | 2008-2                   | Live         | 67                   | Male | 43      | II          |
| C and N                                         | 2008-3                   | Live         | 66                   | Male | 52      | I - II      |
| C and N                                         | 2008-7                   | Live         | 62                   | Male | 61      | II          |
| C and N                                         | 2008-12                  | Live         | 57                   | Male | 54      | II          |
| C and N                                         | 2008-12                  | Live         | 57                   | Male | 48      | I           |
| C and N                                         | 2008-12                  | Live         | 57                   | Male | 48      | II          |
| C and N                                         | 2008-12                  | Live         | 57                   | Male | 70      | II          |
| C and N                                         | 2008-12                  | Live         | 57                   | Male | 70      | II          |
| C and N                                         | 2009-2                   | Live         | 55                   | Male | 52      | II - III    |
| C and N                                         | 2009-2                   | Live         | 55                   | Male | 50      | II          |
| C and N                                         | 2009-2                   | Live         | 55                   | Male | 55      | II          |
| C and N                                         | 2009-3                   | Live         | 54                   | Male | 54      | II          |
| C and N                                         | 2009-3                   | Live         | 54                   | Male | 34      | II          |
| C and N                                         | 2009-3                   | Live         | 54                   | Male | 50      | II          |
| C and N                                         | 2009-6                   | Live         | 51                   | Male | 49      | II          |
| C and N                                         | 2009-6                   | Live         | 51                   | Male | 55      | III         |
| C and N                                         | 2009-7                   | Live         | 50                   | Male | 40      | II - III    |
| C and N                                         | 2009-7                   | Live         | 50                   | Male | 59      | II - III    |
| C and N                                         | 2009-7                   | Live         | 50                   | Male | 63      | II          |

|         |         |       |    |        |    |          |
|---------|---------|-------|----|--------|----|----------|
| C and N | 2009-8  | Live  | 49 | Male   | 63 | I - III  |
| C and N | 2009-10 | Live  | 47 | Male   | 73 | II       |
| C and N | 2009-11 | Live  | 46 | Male   | 47 | II       |
| C       | 2007-4  | Live  | 77 | Male   | 40 | II - III |
| C       | 2007-7  | Live  | 74 | Male   | 58 | I - III  |
| C and N | 2007-8  | Live  | 73 | Female | 44 | II       |
| C and N | 2007-8  | Live  | 73 | Female | 58 | II       |
| C and N | 2008-12 | Live  | 57 | Female | 65 | II       |
| C and N | 2009-3  | Live  | 54 | Female | 67 | II       |
| C and N | 2009-11 | Live  | 46 | Female | 70 | II - III |
| C and N | 2007-2  | Death | 11 | Male   | 65 | III      |
| C and N | 2007-4  | Death | 11 | Male   | 49 | III      |
| C and N | 2007-4  | Death | 14 | Male   | 71 | II       |
| C and N | 2007-4  | Death | 13 | Male   | 70 | II       |
| C and N | 2007-4  | Death | 49 | Male   | 55 | II       |
| C and N | 2007-6  | Death | 4  | Male   | 49 | III      |
| C and N | 2007-7  | Death | 43 | Male   | 69 | II - III |
| C and N | 2007-8  | Death | 29 | Male   | 51 | II - III |
| C and N | 2007-9  | Death | 69 | Male   | 52 | II       |
| C and N | 2008-1  | Death | 29 | Male   | 57 | III      |
| C and N | 2008-3  | Death | 4  | Male   | 56 | III      |
| C and N | 2008-3  | Death | 16 | Male   | 46 | III      |
| C and N | 2008-3  | Death | 4  | Male   | 53 | II       |
| C and N | 2008-3  | Death | 8  | Male   | 48 | II       |
| C and N | 2008-3  | Death | 17 | Male   | 54 | II       |
| C and N | 2008-4  | Death | 11 | Male   | 57 | II - III |
| C and N | 2008-4  | Death | 14 | Male   | 56 | I        |
| C and N | 2008-6  | Death | 4  | Male   | 43 | II       |
| C and N | 2008-8  | Death | 5  | Male   | 49 | II - III |
| C and N | 2008-8  | Death | 1  | Male   | 68 | III      |
| C and N | 2008-11 | Death | 3  | Male   | 42 | II - III |
| C and N | 2008-12 | Death | 57 | Male   | 42 | II       |
| C and N | 2008-12 | Death | 17 | Male   | 39 | II - III |
| C and N | 2008-12 | Death | 17 | Male   | 51 | II       |
| C and N | 2008-12 | Death | 7  | Male   | 38 | II       |
| C and N | 2009-1  | Death | 6  | Male   | 37 | II       |
| C and N | 2009-1  | Death | 15 | Male   | 53 | II - III |
| C and N | 2009-1  | Death | 30 | Male   | 52 | II       |
| C and N | 2009-1  | Death | 34 | Male   | 67 | II - III |
| C and N | 2009-2  | Death | 32 | Male   | 57 | II - III |
| C and N | 2009-3  | Death | 5  | Male   | 51 | II       |
| C and N | 2009-3  | Death | 4  | Male   | 65 | II       |
| C and N | 2009-3  | Death | 6  | Male   | 54 | II       |
| C and N | 2009-5  | Death | 28 | Male   | 63 | II       |

|         |         |       |    |        |    |          |
|---------|---------|-------|----|--------|----|----------|
| C and N | 2009-5  | Death | 33 | Male   | 45 | II - III |
| C and N | 2009-6  | Death | 27 | Male   | 53 | II - III |
| C and N | 2009-7  | Death | 12 | Male   | 49 | III      |
| C and N | 2009-7  | Death | 16 | Male   | 25 | II - III |
| C and N | 2009-7  | Death | 5  | Male   | 40 | II       |
| C and N | 2009-7  | Death | 9  | Male   | 58 | I - III  |
| C and N | 2009-8  | Death | 25 | Male   | 26 | I - III  |
| C and N | 2009-9  | Death | 2  | Male   | 58 | II - III |
| C and N | 2009-10 | Death | 7  | Male   | 69 | II       |
| C and N | 2009-10 | Death | 5  | Male   | 56 | II       |
| C and N | 2009-11 | Death | 30 | Male   | 62 | I - II   |
| C and N | 2009-11 | Death | 19 | Male   | 57 | II - III |
| C and N | 2009-11 | Death | 10 | Male   | 59 | II - III |
| C and N | 2009-11 | Death | 16 | Male   | 38 | II       |
| C and N | 2009-11 | Death | 35 | Male   | 65 | II       |
| C and N | 2009-11 | Death | 12 | Male   | 54 | II       |
| C       | 2007-8  | Death | 32 | Male   | 56 | II       |
| C       | 2008-2  | Death | 35 | Male   | 52 | I - II   |
| C       | 2008-11 | Death | 43 | Male   | 61 | II - III |
| C       | 2009-5  | Death | 4  | Male   | 56 | II - III |
| C       | 2009-11 | Death | 2  | Male   | 44 | II       |
| C and N | 2008-2  | Death | 25 | Female | 48 | II       |
| C and N | 2008-8  | Death | 29 | Female | 66 | II       |
| C and N | 2009-3  | Death | 16 | Female | 54 | II       |
| C and N | 2009-7  | Death | 10 | Female | 44 | II       |
| C and N | 2007-8  | Death | 2  | Female | 57 | II - III |

**Supplementary Table 2. Patient information for HCC fresh samples**

| <b>Sex</b> | <b>Date of birth</b> | <b>Age at surgery</b> | <b>Tissue type(Cancer tissue:C, adjacent normal tissue:N)</b> | <b>Cancer type</b>       | <b>Tissue number</b> |
|------------|----------------------|-----------------------|---------------------------------------------------------------|--------------------------|----------------------|
| Female     | 1971-07-18           | 52                    | C                                                             | Hepatocellular carcinoma | 1 C                  |
| Female     | 1971-07-18           | 52                    | N                                                             | Hepatocellular carcinoma | 1 N                  |
| Female     | 1952-05-04           | 70                    | C                                                             | Hepatocellular carcinoma | 2 C                  |
| Female     | 1952-05-04           | 70                    | N                                                             | Hepatocellular carcinoma | 2 N                  |
| Female     | 1967-04-16           | 53                    | C                                                             | Hepatocellular           | 3 C                  |

|        |            |    |   | carcinoma                |      |
|--------|------------|----|---|--------------------------|------|
| Female | 1967-04-16 | 53 | N | Hepatocellular carcinoma | 3 N  |
| Female | 1965-03-08 | 55 | C | Hepatocellular carcinoma | 4 C  |
| Female | 1965-03-08 | 55 | N | Hepatocellular carcinoma | 4 N  |
| Female | 1993-12-09 | 30 | C | Hepatocellular carcinoma | 5 C  |
| Female | 1993-12-09 | 30 | N | Hepatocellular carcinoma | 5 N  |
| Female | 1981-02-16 | 38 | C | Hepatocellular carcinoma | 6 C  |
| Female | 1981-02-16 | 38 | N | Hepatocellular carcinoma | 6 N  |
| Female | 1949-12-30 | 71 | C | Hepatocellular carcinoma | 7 C  |
| Female | 1949-12-30 | 71 | N | Hepatocellular carcinoma | 7 N  |
| Male   | 1956-08-09 | 65 | C | Hepatocellular carcinoma | 8 C  |
| Male   | 1956-08-09 | 65 | N | Hepatocellular carcinoma | 8 N  |
| Male   | 1971-11-05 | 52 | C | Hepatocellular carcinoma | 9 C  |
| Male   | 1971-11-05 | 52 | N | Hepatocellular carcinoma | 9 N  |
| Male   | 1944-11-26 | 78 | C | Hepatocellular carcinoma | 10 C |
| Male   | 1944-11-26 | 78 | N | Hepatocellular carcinoma | 10 N |
| Male   | 1964-09-12 | 59 | C | Hepatocellular carcinoma | 11 C |
| Male   | 1964-09-12 | 59 | N | Hepatocellular carcinoma | 11 N |
| Female | 1965-01-15 | 56 | C | Hepatocellular carcinoma | 12 C |
| Female | 1965-01-15 | 56 | N | Hepatocellular carcinoma | 12 N |
| Female | 1971-10-27 | 51 | C | Hepatocellular carcinoma | 13 C |
| Female | 1971-10-27 | 51 | N | Hepatocellular carcinoma | 13 N |

|        |            |    |   |                          |      |
|--------|------------|----|---|--------------------------|------|
| Male   | 1959-07-05 | 64 | C | Hepatocellular carcinoma | 14 C |
| Male   | 1959-07-05 | 64 | N | Hepatocellular carcinoma | 14 N |
| Male   | 1973-07-27 | 49 | C | Hepatocellular carcinoma | 15 C |
| Male   | 1973-07-27 | 49 | N | Hepatocellular carcinoma | 15 N |
| Male   | 1973-07-20 | 50 | C | Hepatocellular carcinoma | 16 C |
| Male   | 1973-07-20 | 50 | N | Hepatocellular carcinoma | 16 N |
| Male   | 1964-06-17 | 58 | C | Hepatocellular carcinoma | 17 C |
| Male   | 1964-06-17 | 58 | N | Hepatocellular carcinoma | 17 N |
| Male   | 1976-04-09 | 46 | C | Hepatocellular carcinoma | 18 C |
| Male   | 1976-04-09 | 46 | N | Hepatocellular carcinoma | 18 N |
| Male   | 1967-02-14 | 56 | C | Hepatocellular carcinoma | 19 C |
| Male   | 1967-02-14 | 56 | N | Hepatocellular carcinoma | 19 N |
| Male   | 1962-06-07 | 59 | C | Hepatocellular carcinoma | 20 C |
| Male   | 1962-06-07 | 59 | N | Hepatocellular carcinoma | 20 N |
| Male   | 1959-12-25 | 64 | C | Hepatocellular carcinoma | 21 C |
| Male   | 1959-12-25 | 64 | N | Hepatocellular carcinoma | 21 N |
| Female | 1953-06-12 | 70 | C | Hepatocellular carcinoma | 22 C |
| Female | 1969-08-15 | 51 | N | Hepatocellular carcinoma | 22 N |
| Female | 1965-01-15 | 56 | C | Hepatocellular carcinoma | 23 C |
| Female | 1971-10-27 | 51 | C | Hepatocellular carcinoma | 23 N |
| Female | 1964-12-28 | 59 | C | Hepatocellular carcinoma | 24 C |
| Male   | 1964-09-12 | 59 | C | Hepatocellular carcinoma | 24 N |

---

**Supplementary Table 3. Antibodies used in this study**

| <b>Protein targets</b>          | <b>Assays</b>     | <b>Catalog</b> | <b>Supplier</b>           | <b>Clone name</b> | <b>Lot number</b> |
|---------------------------------|-------------------|----------------|---------------------------|-------------------|-------------------|
| BCL6                            | WB/IHC            | ab203619       | abcam                     | Polyclonal        | GR3252536-4       |
| FLAG                            | WB/ChIP           | 14793S         | Cell Signaling Technology | D6W5B             | 5                 |
| ESM1                            | WB/Flow cytometry | ab103590       | abcam                     | Polyclonal        | 1019528-1         |
| GAPDH                           | WB                | 2118S          | Cell Signaling Technology | 14C10             | 14                |
| CD3                             | WB/IHC            | ab5690         | abcam                     | Polyclonal        | GR3410787-1       |
| CD4                             | IHC               | ab183685       | abcam                     | EPR19514          | GR3375645-19      |
| CD8                             | IHC               | 98941S         | Cell Signaling Technology | D4W2Z             | 6                 |
| CD45 FITC                       | Flow cytometry/WB | 103108         | BioLegend                 | 30-F11            | B388747           |
| CD3 APC-Cy7                     | Flow cytometry    | 100222         | BioLegend                 | 17A2              | B340049           |
| CD4 PerCP-Cy5.5                 | Flow cytometry    | 116012         | BioLegend                 | RM4-4             | B273144           |
| CD4 BV421                       | Flow cytometry    | 100438         | BioLegend                 | GK1.5             | B345333           |
| CD8 PerCP                       | Flow cytometry    | 100732         | BioLegend                 | 53-6.7            | B256659           |
| IFN- $\gamma$ BV510             | Flow cytometry    | 505842         | BioLegend                 | XMG1.2            | B294311           |
| TNF- $\alpha$ PE                | Flow cytometry    | 506306         | BioLegend                 | MP6-XT22          | B336283           |
| IL4 PE                          | Flow cytometry    | 504104         | BioLegend                 | 11B11             | B320933           |
| IL6 APC                         | Flow cytometry    | 504507         | BioLegend                 | MP5-20F3          | B320931           |
| IL17A APC                       | Flow cytometry    | 506915         | BioLegend                 | TC11-18H10.1      | B312893           |
| FOXP3 PE-Cy5                    | Flow cytometry    | 15-5773-82     | eBioscience               | FJK-16s           | 2275289           |
| Ki67                            | Flow cytometry    | ab15580        | abcam                     | polyclonal        | GR3293864-1       |
| PD1 PE                          | Flow cytometry    | 109103         | BioLegend                 | RMP1-30           | B367713           |
| Tim3 APC                        | Flow cytometry    | 119725         | BioLegend                 | RMT3-23           | B315334           |
| NK1.1 APC                       | Flow cytometry    | 108731         | BioLegend                 | PK136             | 3295937           |
| Ly6C BV605                      | Flow cytometry    | 128036         | BioLegend                 | HK1.4             | B335981           |
| CD11b BV650                     | Flow cytometry    | 101259         | BioLegend                 | M1/70             | B350046           |
| Ly6G APC-Cy7                    | Flow cytometry    | 127624         | BioLegend                 | 1A8               | B348489           |
| F4/80 PerCP-Cy5.5               | Flow cytometry    | 123128         | BioLegend                 | BM8               | B256061           |
| CD206 BV421                     | Flow cytometry    | 141721         | BioLegend                 | C068C2            | B361008           |
| Granzyme B-BV421                | Flow cytometry    | 396414         | BioLegend                 | QA18A28           | B369589           |
| Alexa flour 647 anti Rabbit IgG | Flow cytometry    | A21244         | Invitrogen                | Polyclonal        | 2277746           |
| Goat anti rabbit HRP conjugated | WB                | ZB-2301        | ZSGB-Bio                  | Polyclonal        | 210830707         |
